# Supplementary material
Source: PubMed Central journal article supplement (PMC9309186)
Supplement: NIHMS1763833-supplement-1.pdf [file NIHMS1763833-supplement-1.pdf]

**Table S1.**

Descriptive statistics for study measures stratified by maternal race/ethnicity.

| Study Measures                         | Maternal Race/Ethnicity ( <i>M</i> ± <i>SD</i> ) |                               |                 |
|----------------------------------------|--------------------------------------------------|-------------------------------|-----------------|
|                                        | Non-Latina/<br>Hispanic Black                    | Non-Latina/<br>Hispanic White | Latina/Hispanic |
| Preconception PTSD Symptoms (PCL-C)    | 1.4 ± 0.6                                        | 1.3 ± 0.4                     | 1.6 ± 0.7       |
| Prenatal CES-D (20 weeks' GA)          | 18.5 ± 4.5                                       | 15.7 ± 5.5                    | 17.2 ± 5.0      |
| Prenatal CES-D (33 weeks' GA)          | 19.9 ± 5.5                                       | 15.8 ± 4.1                    | 16.2 ± 5.0      |
| Postpartum CES-D (13 weeks postpartum) | 17.4 ± 6.4                                       | 14.7 ± 4.0                    | 15.4 ± 5.0      |
| Prenatal PSS (20 weeks' GA)            | 15.5 ± 6.5                                       | 12.5 ± 6.2                    | 14.8 ± 5.6      |
| Prenatal PSS (33 weeks' GA)            | 17.8 ± 5.2                                       | 16.0 ± 5.0                    | 17.7 ± 5.9      |
| Postpartum PSS (13 weeks postpartum)   | 12.8 ± 6.9                                       | 12.6 ± 4.8                    | 13.2 ± 5.4      |
| Child Negative Affectivity (CBQ-VSF)   | 4.4 ± 0.9                                        | 4.1 ± 0.9                     | 4.1 ± 0.7       |

**Table S2.**

Spearman's rank correlations between preconception PTSD symptoms, prenatal and postpartum depressive symptoms and perceived stress, and child negative affectivity.

|                             | 1  | 2     | 3      | 4      | 5      | 6     |
|-----------------------------|----|-------|--------|--------|--------|-------|
| 1. Preconception PTSD       | -- | .37** | .32**  | .63*** | .43*** | .29** |
| 2. Prenatal CES-D           | -- | --    | .42*** | .49*** | .23*   | .24*  |
| 3. Postpartum CES-D         | -- | --    | --     | .40*** | .62*** | .23*  |
| 4. Prenatal PSS             | -- | --    | --     | --     | .48*** | .11   |
| 5. Postpartum PSS           | -- | --    | --     | --     | --     | .19*  |
| 6. CBQ Negative Affectivity | -- | --    | --     | --     | --     | --    |

Note. \* $p < .05$ . \*\* $p < .01$ . \*\*\* $p < .001$ .

**Table S3.**

Regression models of preconception maternal PTSD symptoms and child negative affectivity without imputation of missing data.

| <b>Model</b>                                                                                            | <b>Predictors</b>                       | <b><math>\beta</math></b> | <b><i>SE</i></b> | <b><i>p</i></b> |
|---------------------------------------------------------------------------------------------------------|-----------------------------------------|---------------------------|------------------|-----------------|
| <b>Model 1: Regression model with identified covariates</b>                                             |                                         |                           |                  |                 |
|                                                                                                         | Preconception PTSD                      | .23                       | .09              | .010*           |
|                                                                                                         | Maternal SES                            | -.10                      | .11              | .380            |
|                                                                                                         | Maternal age                            | .13                       | .11              | .233            |
| <b>Model 2: Regression model with identified covariates and concurrent maternal depressive symptoms</b> |                                         |                           |                  |                 |
|                                                                                                         | Preconception PTSD                      | .20                       | .10              | .043*           |
|                                                                                                         | Maternal SES                            | -.09                      | .11              | .407            |
|                                                                                                         | Maternal age                            | -.13                      | .11              | .239            |
|                                                                                                         | Concurrent maternal depressive symptoms | .07                       | .65              | .516            |

*Note.* Analyses run only for participants with complete data ( $n = 87$ ). SES = socioeconomic status (composite of maternal education and per capita household income adjusted for cost of living).

\* $p < .05$ . \*\* $p < .01$ . \*\*\* $p < .001$ .

**Figure S1.** Prenatal and postpartum depressive symptoms mediational model.

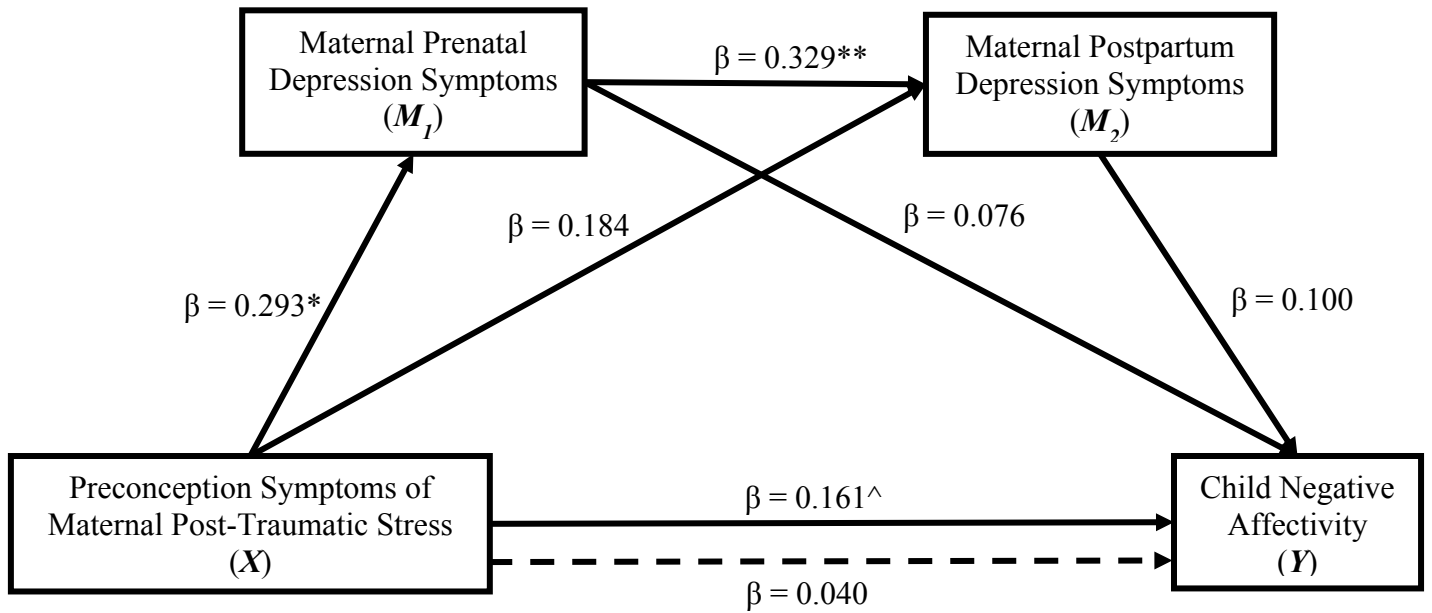

$^\wedge p < .10$ .  $^*p < .05$ .  $^{**}p < .01$ .  $^{***}p < .001$ .

**Figure S2.** Prenatal and postpartum perceived stress mediational model.

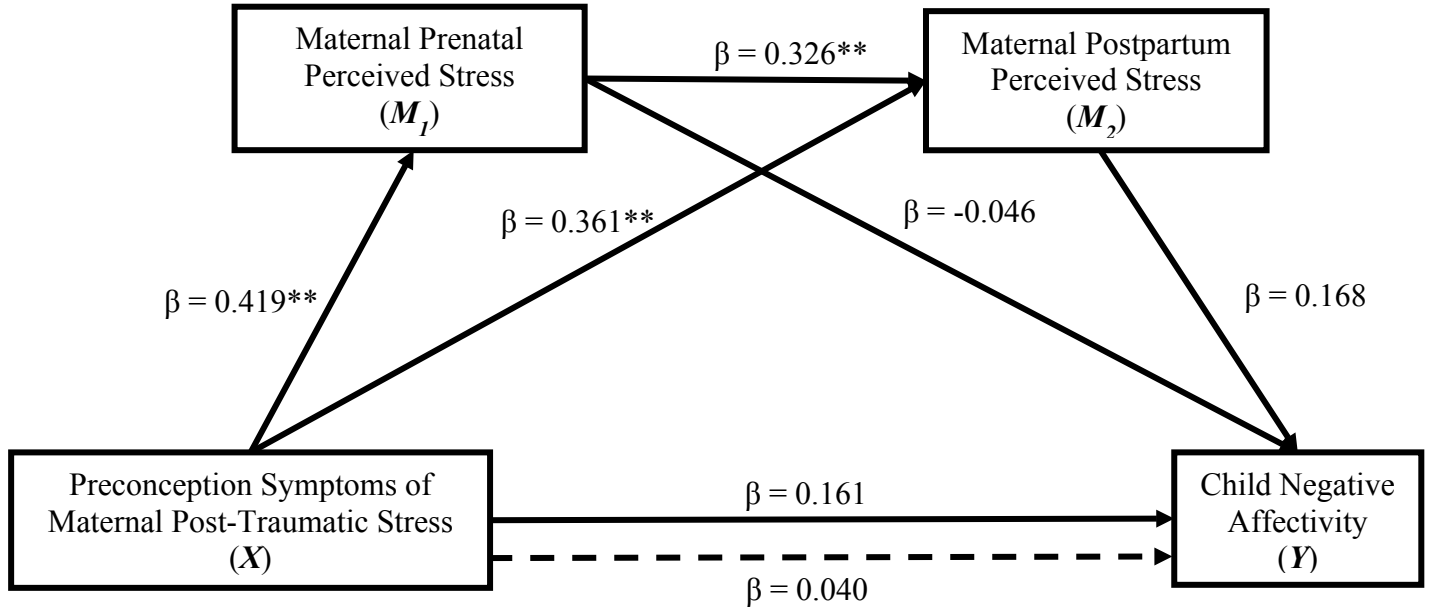

$^{\wedge} p < .10$ .  $^* p < .05$ .  $^{**} p < .01$ .  $^{***} p < .001$ .
